# Supplementary material for: Host–guest chemistry of giant molecular shape amphiphiles based on POSS–PDI conjugates
Source: Royal Society of Chemistry journal article supplement (doi:10.1039/d0nr08934f), 2021-01-01
Supplement: d0nr08934f1.pdf [file d0nr08934f1.pdf]

## Supporting Information

### Host-Guest Chemistry of Giant Molecular Shape Amphiphiles Based on POSS–PDI Conjugates

*Jia Chen,<sup>1</sup> Heng-Yi Lin,<sup>2</sup> Xiaohuan Ji,<sup>1</sup> Haoru Zhao,<sup>1</sup> Bin Sun,<sup>1, \*</sup> Chien-Lung Wang,<sup>2, \*</sup>  
Meifang Zhu<sup>1, \*</sup>*

<sup>1</sup> State Key Laboratory for Modification of Chemical Fibers and Polymer Materials,  
College of Materials Science and Engineering, and Center for Advanced Low-  
dimension Materials, Donghua University, 201620, Shanghai, P. R. China

<sup>2</sup> Department of Applied Chemistry, National Chiao Tung University, 1001 Ta Hsueh  
Road, HsinChu, 30010, Taiwan.

E-mail: sunbin@dhu.edu.cn; kclwang@nctu.edu.tw; zmf@dhu.edu.cn

#### Materials.

Perylene, pyrene and anthracene were obtained from MACKLIN. TCM and MeOH were obtained from Sinopharm(Shanghai). The solvents or chemicals were commercially available and used directly.

#### Sample preparation.

Compound **PPP** was prepared according to the reported methods<sup>1</sup>.

The films were prepared through drop-casting from 10 ul corresponding CHCl<sub>3</sub> solutions and the **PPP** concentration in CHCl<sub>3</sub> was 5×10<sup>-3</sup> M.

Crystals of the **PPP**/pyrene and **PPP**/perylene were grown by slowly evaporating the solvent of a 1:4 **PPP**/perylene CHCl<sub>3</sub> solution and a 1:8 **PPP**/pyrene CHCl<sub>3</sub> solution (**Figure. S2**). Since **PPP** itself is crystalline, to prevent the crystallization of pristine

**PPP**, excess amounts of the guest molecules were used in the solutions. A higher equivalent of pyrene was used to prepare the **PPP**/pyrene crystals because of the lower  $K_{AD}$  of pyrene to **PPP**.

## Equipment and Experiments.

### Solution Nuclear Magnetic Resonance (NMR) Spectroscopy.

All  $^1\text{H}$  NMR spectra were acquired in  $\text{CDCl}_3$  (Adamas, 99.8% D) using a AVANCE III 600 NMR spectrometer. The  $^1\text{H}$  NMR spectra were referenced to the residual proton impurities in the  $\text{CDCl}_3$  at  $\delta$  7.26 ppm. The concentration of **PPP** was fixed at 4.16 mM in all solutions.

### Fluorescence Spectroscopy.

Fluorescence emission spectra were carried out on a fluorescence spectrophotometer (JASCO FP-6600). The dilute solution spectra were recorded in 2mm quartz cuvette and the concentration of **PPP** in  $\text{CHCl}_3$  is 0.84 mM. The sample for film fluorescence emission spectra experiments were prepared by drop casting 10  $\mu\text{l}$   $\text{CHCl}_3$  solution on quartz glass and the **PPP** concentration in  $\text{CHCl}_3$  was  $5 \times 10^{-3}$  M.

### X-ray Diffraction.

The crystallographic structure of the **PPP**/pyrene crystal was obtained with X-ray diffraction (XRD, Bruker APEX II,  $\text{Cu K}_\alpha$  radiation). The pristine **PPP** and **PPP**/guest complexes powders were obtained by drying the  $\text{CHCl}_3$  solutions of **PPP** and the **PPP**/guest mixtures, respectively. To obtain the needle-like crystal for the measurement of 2D XRD patterns, the cocrystal was prepared by slow evaporation of a 0.4 wt% **PPP**

CHCl<sub>3</sub> solution that contains 4 equivalent perylene or 8 equivalent pyrene in methanol (MeOH) atmosphere. The volume of MeOH is twice of chloroform solution. The 2D XRD patterns of the **PPP** and **PPP**/pyrene cocrystal were obtained by recording the XRD signal while rotating a needle crystal of **PPP** or **PPP**/pyrene.

#### **Fluorescence microscope.**

Fluorescence microscope images (excited at 530 - 550 nm) were recorded by (Olympus BX-51).

#### **Computer Simulation.**

Cerius2 program assisted the construction of molecular packing model and crystallographic simulation. Initial model was built based on the unit cell parameters calculated from the experimental results. X-ray diffraction (XRD) patterns can be simulated from this model and will be compared by the experimental data.

#### **Additional characterization data.**

##### **Supplementary Figures**

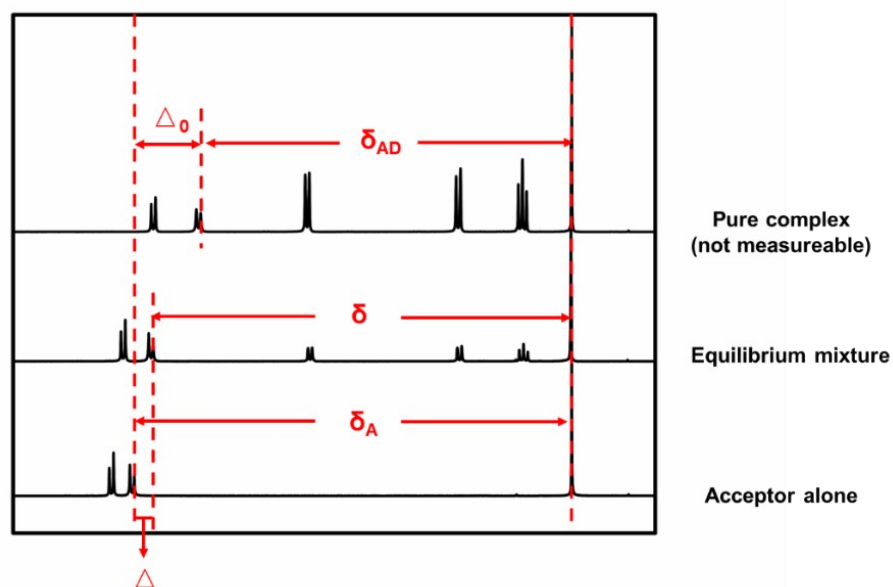

**Figure S1.** The graphic symbol of  $\Delta$ ,  $\Delta_0$ .

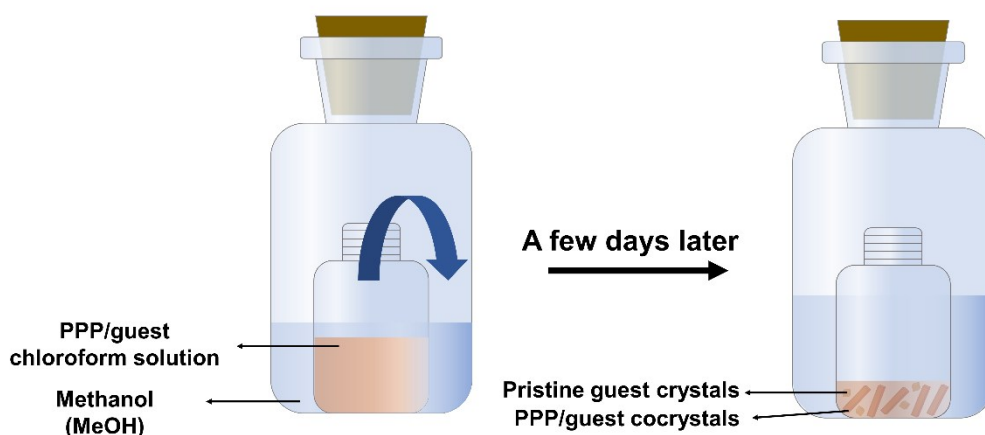

**Figure S2.** Illustration of the “slowly evaporating the solvent” cocrystal preparation method. Crystals of the **PPP**/pyrene and **PPP**/perylene mixtures were grown by slowly evaporating the solvent of a 1:4 **PPP**/perylene  $\text{CHCl}_3$  solution and a 1:8 **PPP**/pyrene  $\text{CHCl}_3$  solution. The concentration of **PPP** in  $\text{CHCl}_3$  was 0.4 wt% and the volume of methanol is twice of chloroform solution.

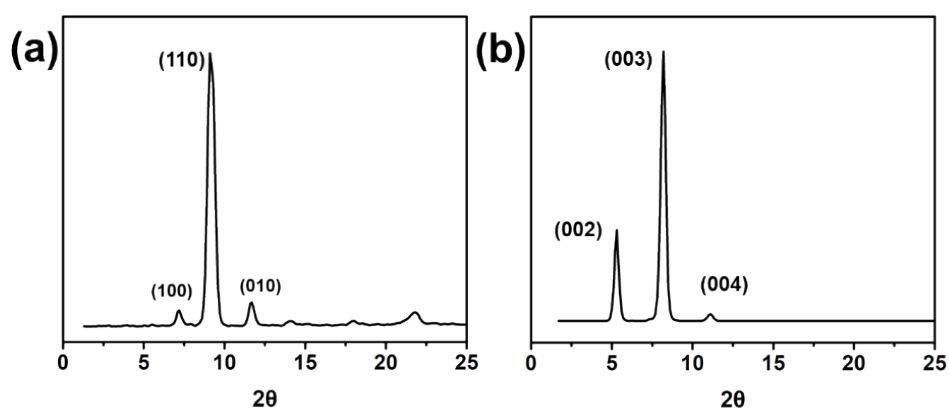

**Figure S3.** 1D pattern stemmed from the integral of the diffraction along (a) (hk0) and (b) (00l) in Figure 7a.

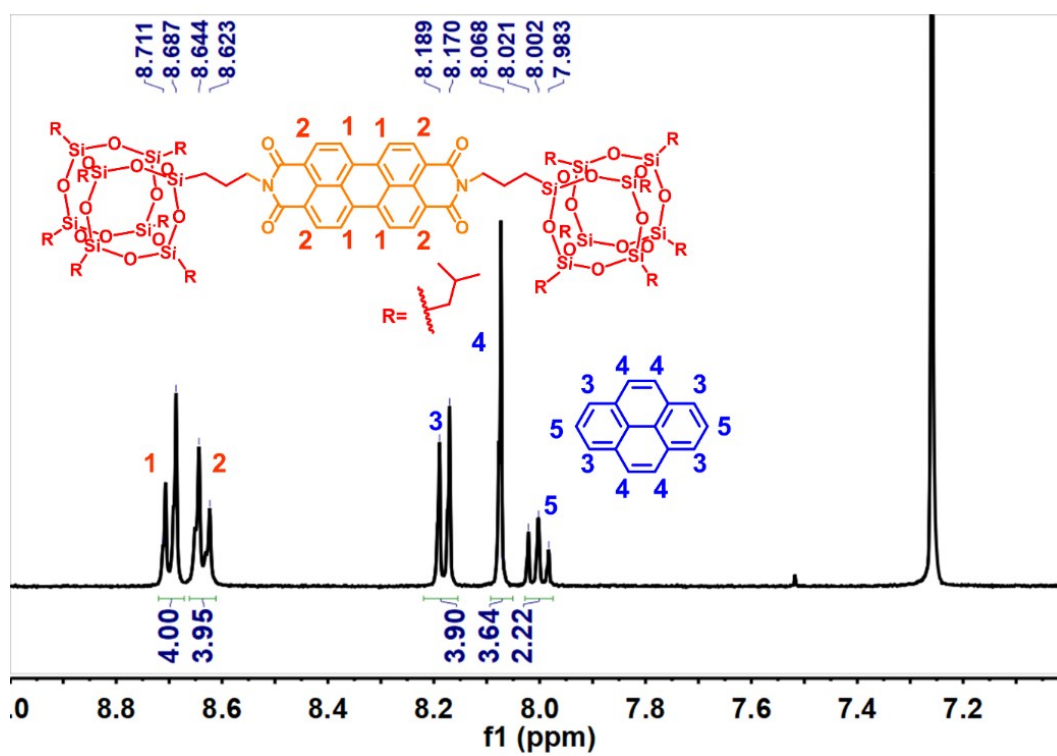

**Figure S4.** NMR spectra of (a) PPP/perylene cocrystal and (b) PPP/pyrene cocrystal.

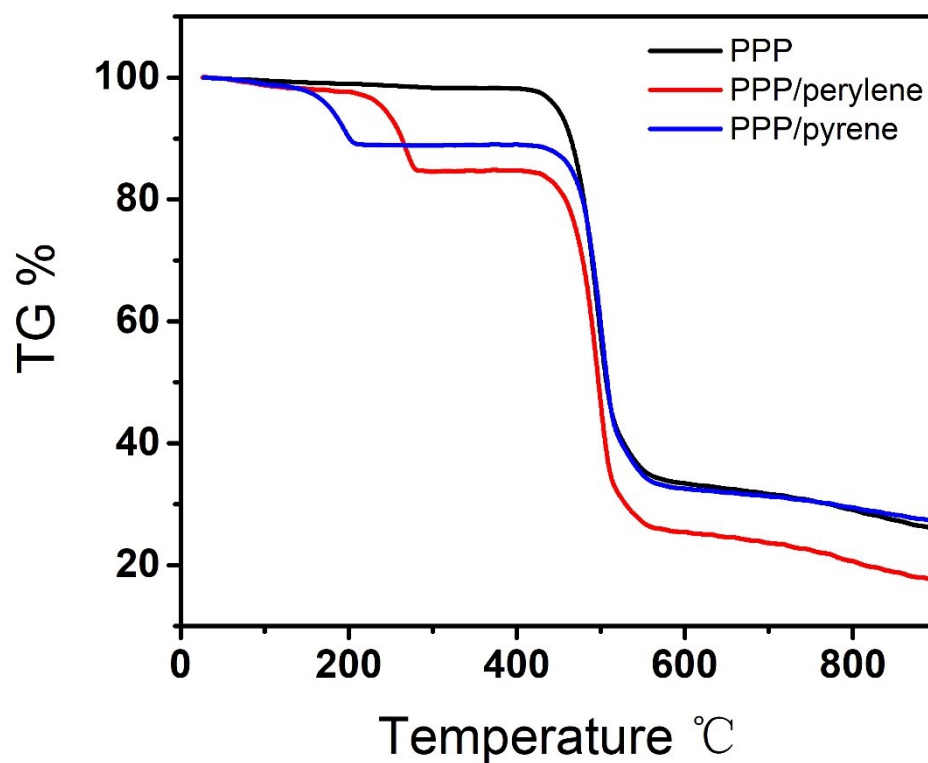

**Figure S5.** TGA curve of **PPP**, **PPP/perylene** and **PPP/pyrene** crystals. The sample was heated under nitrogen from 30 °C to 900 °C at a scanning rate of 10 °C/min with TGA (Perkin-Elmer).

## Reference

1. Y. Shao, G.-Z. Yin, X. Ren, X. Zhang, J. Wang, K. Guo, X. Li, C. Wesdemiotis, W.-B. Zhang, S. Yang, M. Zhu and B. Sun, *RSC. Adv.*, 2017, **7**, 6530-6537.
